# Supplementary material
Source: publisher site journal article supplement (https://www.dovepress.com/article/192277)
Supplement: Supplementary file 1 [file get_supplementary_file.php]

Supporting Information on:

**Photocatalytic antibacterial application of zinc oxide nanoparticles  
and self-assembled networks under dual UV irradiation for enhanced  
disinfection**

Su-Eon Jin<sup>1,\*</sup>, Jun Eon Jin<sup>2</sup>, Woochul Hwang<sup>3</sup>, and Seok Won Hong<sup>4</sup>

<sup>1</sup> Research Institute for Medical Sciences, College of Medicine, Inha University, Incheon, 22212, Korea

<sup>2</sup> College of Electrical Engineering, Korea University, Seoul, 02841, Korea

<sup>3</sup> ECOSET Co., Ltd., Ansan, 15610, Korea

<sup>4</sup> Korea Institute of Science and Technology, Seoul, 02792, Korea

\*Correspondence:

Su-Eon Jin, Ph.D.

Research Institute for Medical Sciences, College of Medicine, Inha University, 100 Inha-ro, Michuhol-gu, Incheon, 22212, Korea

E-mail: jins@inha.ac.kr

*Field emission-scanning electron microscopy (FE-SEM) of conventional ZnO particles*

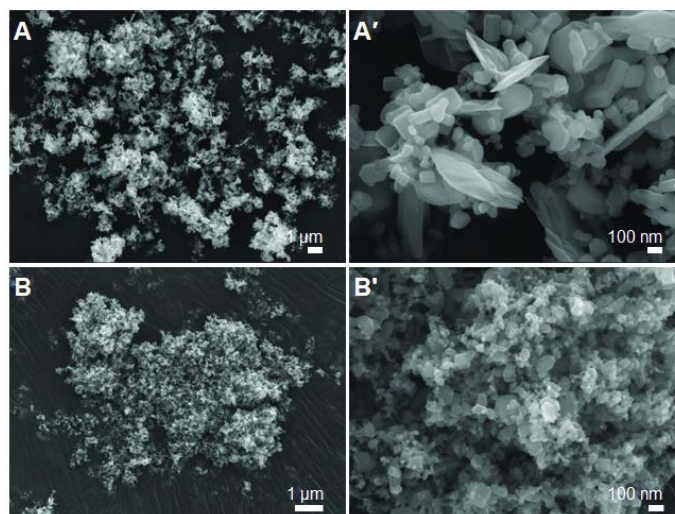

Figure S1 FE-SEM images of conventional ZnO particles: (A, A') nano- to micro-ZnO (hybrid-ZnO) and (B, B') nano-ZnO.

### *X-ray photoelectron spectroscopy (XPS) of ZnO particles*

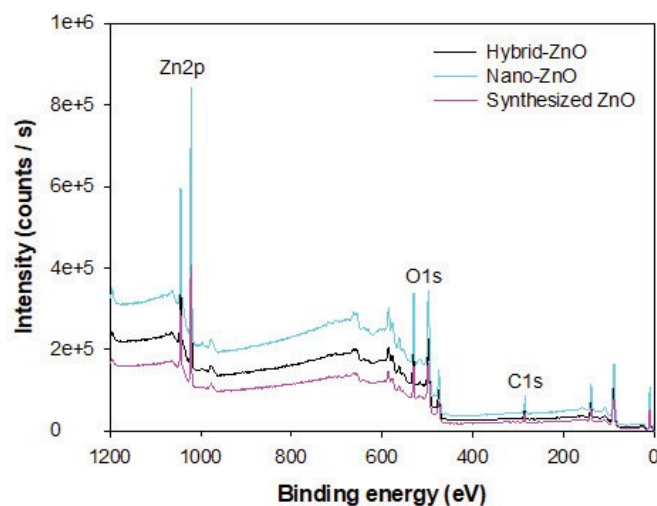

Figure S2 XPS spectra of ZnO particles. Binding energy peaks of ZnO particles were respectively detected at 1,021 eV and 1,044 eV for Zn2p, 530 eV for O1s and 285 eV for C1s.

*FE-SEM of conventional ZnO particles immobilized on Si wafers*

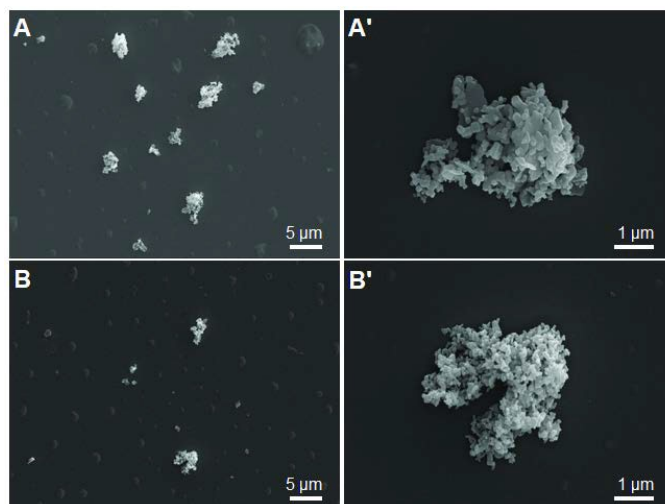

Figure S3 FE-SEM images of (A, A') hybrid-ZnO and (B, B') nano-ZnO on Si wafers. Their concentrations were fixed at 0.5 mg/wafer.

### *Inductively coupled plasma-mass spectrometry (ICP-MS)*

The concentrations of Zn ion released from ZnO particles immobilized on Si wafers were monitored using an ICP-MS (ELAN6100, PerkinElmer, USA). Water samples were collected after 24-h incubation and directly injected into the equipment without further treatment at the flow rate of 0.5 mL/min. Operation conditions were 1,500 W, 18 L/min, 1.25 L/min, and 1.02 L/min of RF power, plasma gas flow, auxiliary gas flow, and nebulizer gas flow, respectively.

Table S1 Zn ion release from ZnO particles immobilized on Si wafer (n=3).

| Immobilized particles<br>(concentration) | Hybrid-ZnO         | Nano-ZnO | Synthesized ZnO |
|------------------------------------------|--------------------|----------|-----------------|
|                                          | (0.05 mg/Si wafer) |          |                 |
| Zn ion detection                         | N.D.               | N.D.     | N.D.            |

N.D.: not detected

## Gene ontology (GO) analysis

Table S2 Gene ontology (GO) of oxidative stress in *E. coli* (EcoCyc).

| GO-terms                                  | Parents of GO class             | Children of GO class                                                                                                                                                                                                                                                                                                                                                                                                                                                                                                                                                                                                                                                                         | GO term members                                                                                                                                                                                                                                                                                                                                                                                                                                                                                                                                                                                                                                                                                                                                                                                                                                                                                                                                                                                                                                                                                                                                                                                                                                                                                                                                                                                                                                                             |
|-------------------------------------------|---------------------------------|----------------------------------------------------------------------------------------------------------------------------------------------------------------------------------------------------------------------------------------------------------------------------------------------------------------------------------------------------------------------------------------------------------------------------------------------------------------------------------------------------------------------------------------------------------------------------------------------------------------------------------------------------------------------------------------------|-----------------------------------------------------------------------------------------------------------------------------------------------------------------------------------------------------------------------------------------------------------------------------------------------------------------------------------------------------------------------------------------------------------------------------------------------------------------------------------------------------------------------------------------------------------------------------------------------------------------------------------------------------------------------------------------------------------------------------------------------------------------------------------------------------------------------------------------------------------------------------------------------------------------------------------------------------------------------------------------------------------------------------------------------------------------------------------------------------------------------------------------------------------------------------------------------------------------------------------------------------------------------------------------------------------------------------------------------------------------------------------------------------------------------------------------------------------------------------|
| GO:0006979 - response to oxidative stress | GO:0006950 - response to stress | GO:0071450 - cellular response to oxygen radical<br>GO:0071451 - cellular response to superoxide<br>GO:0000303 - response to superoxide<br>GO:0071731 - response to nitric oxide<br>GO:1901530 - response to hypochlorite<br>GO:0034599 - cellular response to oxidative stress<br>GO:0000305 - response to oxygen radical<br>GO:0033194 - response to hydroperoxide<br>GO:0070301 - cellular response to hydrogen peroxide<br>GO:0071732 - cellular response to nitric oxide<br>GO:0033195 - response to alkyl hydroperoxide<br>GO:0000302 - response to reactive oxygen species<br>GO:0042542 - response to hydrogen peroxide<br>GO:0034614 - cellular response to reactive oxygen species | DUF1107 domain-containing protein YtfK<br>fused DNA-binding transcriptional repressor / proline dehydrogenase / 1-pyrroline-5-carboxylate dehydrogenase PutA<br>3-mercaptopyruvate sulfurtransferase<br>molecular chaperone Hsp33<br>cell division protein required during stress conditions<br>ferrous iron transport system protein EfeO<br>periplasmic protein-L-methionine sulfoxide reductase catalytic subunit<br>2,3-bisphosphoglycerate-independent phosphoglycerate mutase<br>ATP-dependent Clp protease ATP-binding subunit ClpA<br>putative hydratase YbhJ<br>flavin reductase<br>lipoamide dehydrogenase<br>Fe-S cluster scaffold complex subunit SufD<br>isocitrate dehydrogenase<br>sulfate adenylyltransferase subunit 2<br>conserved inner membrane protein YidH<br>protein RseC<br>ferredoxin-type protein<br>putative transporter YaaU<br>Sel1 repeat-containing protein YbeQ<br>ferritin iron storage protein<br>sulfur acceptor for SufS cysteine desulfurase<br>alkyl hydroperoxide reductase, AhpC component<br>thioredoxin/glutathione peroxidase<br>catalase II<br>redox-responsive ATPase YchF<br>hydroperoxidase I<br>nucleotide binding filament protein<br>small regulatory RNA MicF<br>fumarase C<br>peptidyl-lysine acetyltransferase<br>FMN dependent NADH:quinone oxidoreductase<br>osmotically inducible peroxiredoxin<br>CPS-53 (KpLE1) prophage; protein YfdS<br>CPS-53 (KpLE1) prophage; putative defective phage replication protein O |

|                                                          |                                                                                                                                                             |                                                                                                                                                                                                                                                                                             |                                                                                                                                                                                                                                                                                                                                                                                                                                                                                                                                                                                                                                                                                   |
|----------------------------------------------------------|-------------------------------------------------------------------------------------------------------------------------------------------------------------|---------------------------------------------------------------------------------------------------------------------------------------------------------------------------------------------------------------------------------------------------------------------------------------------|-----------------------------------------------------------------------------------------------------------------------------------------------------------------------------------------------------------------------------------------------------------------------------------------------------------------------------------------------------------------------------------------------------------------------------------------------------------------------------------------------------------------------------------------------------------------------------------------------------------------------------------------------------------------------------------|
|                                                          |                                                                                                                                                             |                                                                                                                                                                                                                                                                                             | CPS-53 (KpLE1) prophage; putative tail fiber assembly protein YfdK<br>putative pyruvate-flavodoxin oxidoreductase<br>superoxide dismutase (Mn)<br>2-octaprenyl-6-methoxyphenol hydroxylase<br>iron-sulfur cluster insertion protein SufA<br>thiol peroxidase<br>iron-sulfur cluster carrier protein NfuA<br>protein/nucleic acid deglycase 2<br>NAD(P)H:quinone oxidoreductase<br>small regulatory RNA OxyS<br>DNA-binding transcriptional dual regulator SoxR<br>DNA-binding transcriptional dual regulator OxyR<br>disulfide reductase<br>methionine sulfoxide reductase B<br>methionine sulfoxide reductase A<br>periplasmic serine endoprotease DegP<br>aconitate hydratase 1 |
| GO:0034599 -<br>cellular response<br>to oxidative stress | GO:0006979 -<br>response to oxidative<br>stress<br>GO:0033554 - cellular<br>response to stress<br>GO:0070887 - cellular<br>response to chemical<br>stimulus | GO:0071450 - cellular<br>response to oxygen radical<br>GO:0071451 - cellular<br>response to superoxide<br>GO:0070301 - cellular<br>response to hydrogen<br>peroxide<br>GO:0071732 - cellular<br>response to nitric oxide<br>GO:0034614 - cellular<br>response to reactive oxygen<br>species | frataxin CyaY<br>putative quinone oxidoreductase 1<br>reduced thioredoxin 2<br>thioredoxin 1<br>membrane-bound lytic murein transglycosylase C<br>putative Fe <sup>2+</sup> -trafficking protein<br>glucose-6-phosphate isomerase<br>protein/nucleic acid deglycase 3<br>Mn <sup>2+</sup> /Fe <sup>2+</sup> : H <sup>+</sup> symporter MntH<br>lipid hydroperoxide peroxidase                                                                                                                                                                                                                                                                                                     |

*Microscopic analysis of HaCaT cells after ZnO nanoparticle treatment*

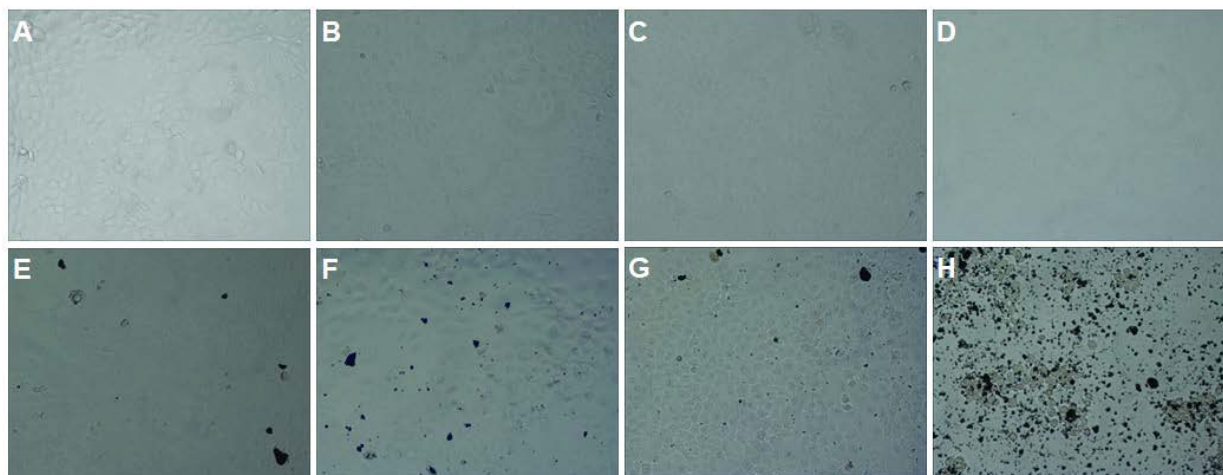

Figure S4 Representative HaCaT images after 48-h treatment of synthesized ZnO nanoparticles. Concentrations were used at (A) 0, (B) 0.01, (C) 0.1, (D) 1.0, (E) 2.0, (F-G) 5.0, and (H) 10.0 mg/mL.

## Phototoxicity of conventional ZnO particles

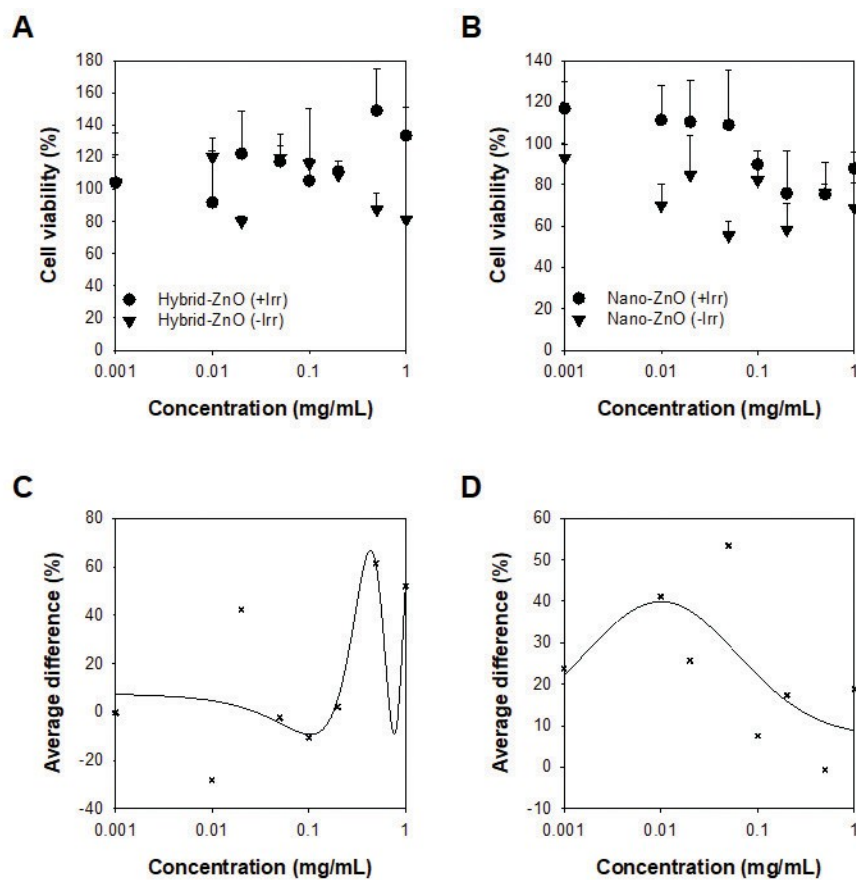

Figure S5 Phototoxicity of ZnO particles, (A, C) hybrid-ZnO and (B, D) nano-ZnO: (A, B) cell viability in Balb/c 3T3 cells and (C, D) average difference of cell viability levels with and without UV irradiation (+Irr, with UV irradiation; -Irr, without UV irradiation).
